# Supplementary material for: Evaluating the hydrological consistency of evaporation products using satellite-based gravity and rainfall data
Source: Copernicus journal article supplement (doi:10.5194/hess-21-323-2017), 2017-01-18
Supplement: Supplementary file 1 [file hess-21-323-2017-supplement.pdf]

Supplement of Hydrol. Earth Syst. Sci., 21, 323–343, 2017  
<http://www.hydrol-earth-syst-sci.net/21/323/2017/>  
doi:10.5194/hess-21-323-2017-supplement  
© Author(s) 2017. CC Attribution 3.0 License.

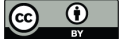

*Supplement of*

## **Evaluating the hydrological consistency of evaporation products using satellite-based gravity and rainfall data**

**Oliver López et al.**

*Correspondence to:* Oliver López (oliver.lopez@kaust.edu.sa)

The copyright of individual parts of the supplement might differ from the CC-BY 3.0 licence.

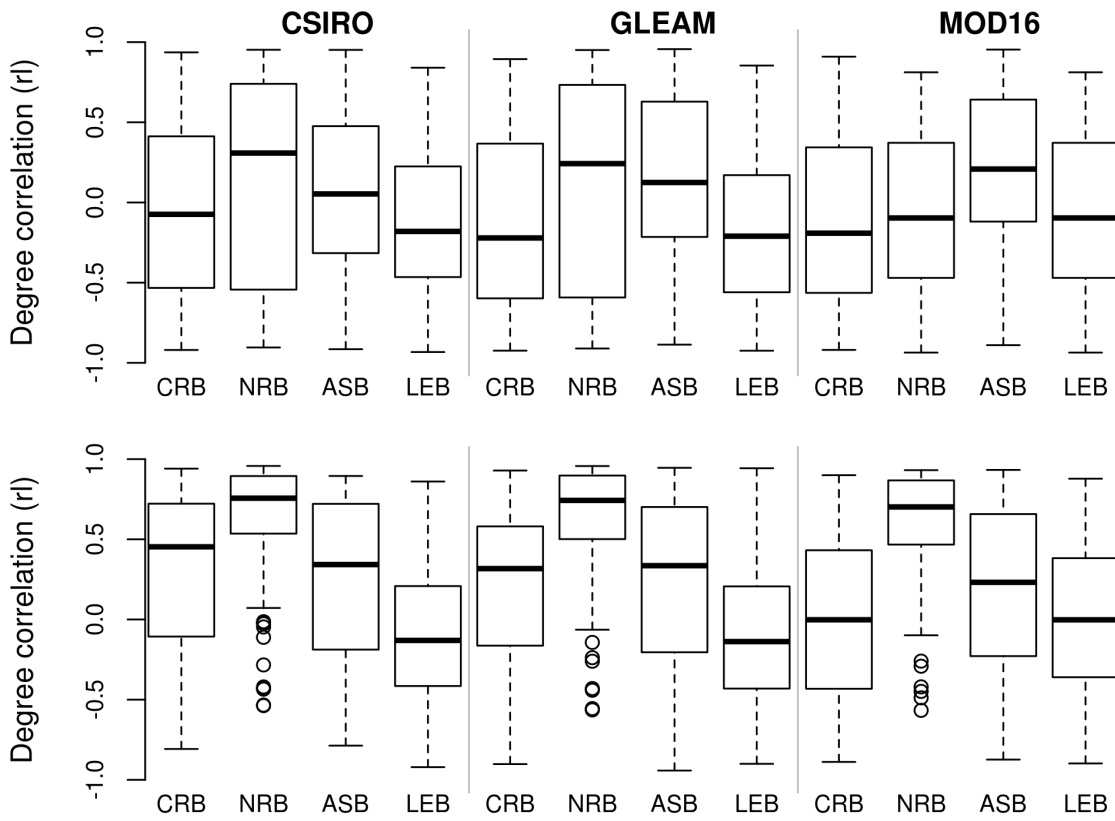

Figure S1. Top: average degree correlation statistics per study region and evaporation product. Bottom: GRACE data were shifted by two months to match the phase with P-E anomalies. The boxplots show the first, second (median) and third quartiles. Outliers, defined as data outside the 1.5 inter-quartile range (IQR) whiskers below or above the first and third quartiles are shown as circles. This figure represents a summary of the analysis using the PERSIANN product as precipitation. The results are very similar to those in Figure 8.
